# Supplementary material for: Design of high polarization low switching barrier hybrid improper ferroelectric perovskite oxide superlattices
Source: Royal Society of Chemistry journal article supplement (doi:10.1039/d3mh01285a), 2023-01-01
Supplement: d3mh01285a1.pdf [file d3mh01285a1.pdf]

## Design of High Polarization Low Switching Barrier Hybrid Improper Ferroelectric Perovskite Oxide Superlattices

M J Swamynadhan<sup>1</sup>, Ayana Ghosh<sup>2</sup> and Saurabh Ghosh<sup>1\*</sup>

<sup>1</sup>Department of Physics and Nanotechnology, Faculty of Engineering and Technology, SRM Institute of Science and Technology, Kattankulathur - 603 203, Tamil Nadu, India

<sup>2</sup>Computational Sciences and Engineering Division, Oak Ridge National Laboratory, Oak Ridge, 37831, TN, USA

### Supporting information

#### High Polarization and Low Switching Barrier:

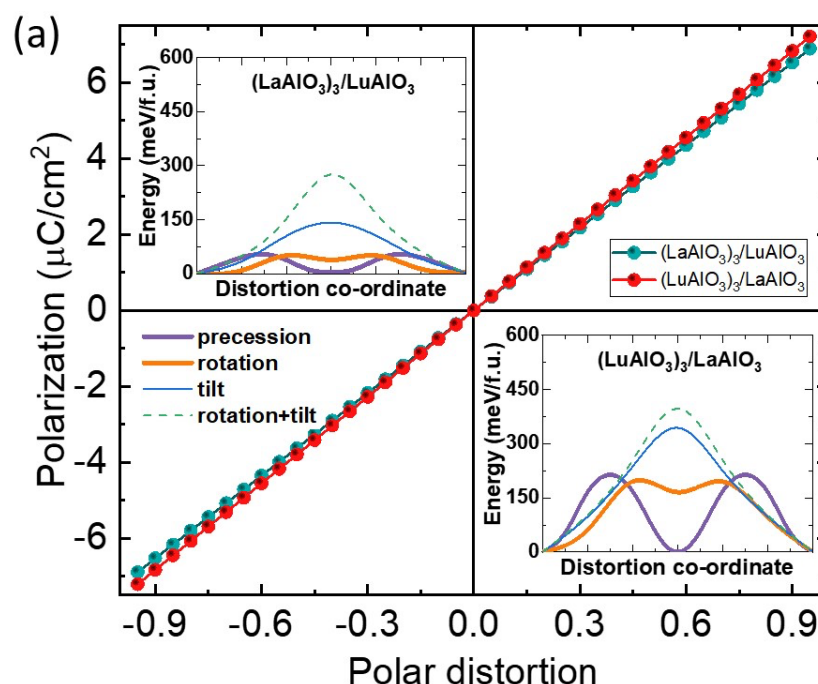

**Figure S1.** Comparison of Polarization in  $(\text{LaAlO}_3)_1/(\text{LuAlO}_3)_3$  and  $\text{LuAlO}_3)_1/(\text{LaAlO}_3)_3$  as a function of normalized polar distortion. The inset figures show the switching barrier for the out-of-phase rotation, precession and conventional rotation and conventional tilt switching path obtained from NEB calculations for the respective system

#### Energy barriers for different pathways:

**Table S1:** Energy barriers from NEB

| A  | A' | Rotation barrier (meV) | out-of-phase barrier (meV) | Rot+tilt barrier (Via H.S.) (meV) | Tilt barrier (meV) | Precession barrier (meV) |
|----|----|------------------------|----------------------------|-----------------------------------|--------------------|--------------------------|
| Ce | Dy | 168.9                  | 82.4                       | 516.5                             | 356.2              | 83.2                     |
| Ce | Gd | 102.4                  | 46.6                       | 373.1                             | 277.1              | 47.1                     |
| Ce | La | 12.4                   | 10.7                       | 25.1                              | 20.4               | 10.9                     |
| Ce | Lu | 339.6                  | 167.8                      | 899.8                             | 560.8              | 168.0                    |
| Ce | Nd | 9.0                    | 4.5                        | 128.9                             | 125.1              | 5.4                      |

|    |    |       |       |        |       |       |
|----|----|-------|-------|--------|-------|-------|
| Ce | Sm | 42.3  | 16.8  | 230.6  | 189.8 | 17.6  |
| Ce | Tm | 287.5 | 142.3 | 772.9  | 495.4 | 144.7 |
| Ce | Y  | 218.5 | 108.4 | 511.8  | 296.5 | 116.2 |
| Dy | Ce | 41.4  | 19.1  | 191.4  | 154.9 | 20.1  |
| Dy | Gd | 190.3 | 91.6  | 549.6  | 368.1 | 92.0  |
| Dy | La | 43.8  | 21.7  | 181.0  | 142.5 | 22.0  |
| Dy | Lu | 440.6 | 220.1 | 1098.3 | 664.0 | 223.4 |
| Dy | Nd | 60.4  | 28.5  | 274.6  | 214.4 | 29.0  |
| Dy | Sm | 112.0 | 52.4  | 392.9  | 281.5 | 53.1  |
| Dy | Tm | 390.5 | 192.7 | 944.8  | 555.6 | 199.9 |
| Dy | Y  | 268.5 | 130.8 | 713.3  | 451.2 | 140.0 |
| Gd | Ce | 25.2  | 12.5  | 151.0  | 131.3 | 13.3  |
| Gd | Dy | 241.5 | 120.1 | 651.6  | 413.8 | 124.9 |
| Gd | La | 27.3  | 9.7   | 139.6  | 115.8 | 10.1  |
| Gd | Lu | 420.2 | 209.6 | 1045.4 | 634.7 | 214.4 |
| Gd | Nd | 42.7  | 17.2  | 232.1  | 195.6 | 17.4  |
| Gd | Sm | 90.4  | 41.7  | 346.5  | 264.5 | 41.8  |
| Gd | Tm | 362.4 | 180.5 | 890.1  | 530.3 | 188.3 |
| Gd | Y  | 241.6 | 120.4 | 660.2  | 423.2 | 122.4 |
| La | Ce | 1.6   | 1.0   | 49.9   | 48.6  | 1.9   |
| La | Dy | 167.8 | 83.3  | 513.1  | 345.7 | 83.9  |
| La | Gd | 102.6 | 50.3  | 369.8  | 276.9 | 50.4  |
| La | Lu | 345.7 | 209.4 | 420.8  | 369.0 | 237.2 |
| La | Nd | 8.5   | 5.7   | 123.4  | 121.0 | 5.9   |
| La | Sm | 42.2  | 17.7  | 226.8  | 185.2 | 18.3  |
| La | Tm | 276.7 | 134.2 | 743.6  | 470.5 | 140.8 |
| La | Y  | 168.8 | 83.5  | 517.6  | 351.1 | 84.0  |
| Lu | Ce | 78.6  | 35.4  | 283.1  | 211.5 | 35.7  |
| Lu | Dy | 313.4 | 155.3 | 819.8  | 506.7 | 160.8 |
| Lu | Gd | 217.1 | 106.3 | 641.1  | 433.2 | 113.4 |
| Lu | La | 240.0 | 73.5  | 293.2  | 153.9 | 74.1  |
| Lu | Nd | 107.0 | 51.7  | 375.4  | 270.0 | 52.4  |
| Lu | Sm | 144.2 | 67.5  | 490.3  | 350.4 | 67.8  |
| Lu | Tm | 816.4 | 403.7 | 1197.0 | 384.3 | 409.3 |
| Lu | Y  | 221.5 | 109.3 | 762.7  | 549.9 | 113.6 |
| Nd | Ce | 3.2   | 2.4   | 78.6   | 76.1  | 3.2   |
| Nd | Dy | 188.4 | 90.8  | 551.3  | 363.7 | 91.1  |
| Nd | Gd | 118.7 | 55.7  | 406.0  | 291.8 | 56.2  |
| Nd | La | 2.6   | 1.9   | 65.0   | 62.9  | 2.1   |
| Nd | Lu | 363.5 | 178.6 | 937.3  | 578.3 | 188.5 |
| Nd | Sm | 52.4  | 23.6  | 259.6  | 209.6 | 23.7  |
| Nd | Tm | 303.6 | 146.8 | 785.1  | 485.6 | 153.0 |
| Nd | Y  | 189.5 | 93.1  | 558.0  | 372.5 | 93.2  |
| Sm | Ce | 10.9  | 5.9   | 109.9  | 99.2  | 6.8   |
| Sm | Dy | 212.5 | 102.4 | 596.4  | 386.9 | 109.3 |
| Sm | Gd | 139.6 | 67.2  | 447.9  | 316.8 | 67.9  |

|    |     |       |       |        |       |       |
|----|-----|-------|-------|--------|-------|-------|
| Sm | La  | 11.7  | 6.2   | 97.3   | 86.4  | 6.5   |
| Sm | Lu  | 385.8 | 189.1 | 985.9  | 606.0 | 198.5 |
| Sm | Nd  | 17.8  | 4.5   | 184.4  | 176.3 | 4.9   |
| Sm | Tm  | 330.8 | 164.1 | 832.2  | 508.7 | 167.0 |
| Sm | Y   | 212.9 | 102.6 | 603.8  | 395.7 | 110.3 |
| Tm | Ce  | 74.6  | 35.4  | 263.5  | 198.3 | 36.3  |
| Tm | Dy  | 308.1 | 153.6 | 782.5  | 481.9 | 158.0 |
| Tm | Gd  | 228.5 | 112.6 | 626.1  | 398.8 | 122.5 |
| Tm | La  | 74.1  | 34.3  | 248.3  | 176.7 | 35.0  |
| Tm | Lu  | 508.2 | 347.6 | 608.9  | 528.3 | 355.7 |
| Tm | Nd  | 91.3  | 43.2  | 344.1  | 252.8 | 43.9  |
| Tm | Sm  | 146.8 | 70.2  | 465.8  | 322.4 | 71.0  |
| Tm | Y   | 308.5 | 153.6 | 792.9  | 492.1 | 163.4 |
| Y  | YCe | 50.2  | 22.1  | 185.8  | 137.3 | 22.1  |
| Y  | YDy | 267.9 | 132.3 | 706.3  | 442.1 | 141.4 |
| Y  | YGd | 190.2 | 94.9  | 551.9  | 370.8 | 95.0  |
| Y  | YLa | 44.7  | 21.7  | 179.8  | 141.8 | 22.2  |
| Y  | YLu | 441.2 | 216.4 | 1102.0 | 663.1 | 223.5 |
| Y  | YNd | 61.1  | 30.2  | 275.3  | 222.7 | 30.6  |
| Y  | YSm | 112.4 | 52.9  | 394.3  | 284.5 | 53.2  |
| Y  | YTm | 390.4 | 194.5 | 949.0  | 560.9 | 198.1 |

### Finite temperature AIMD:

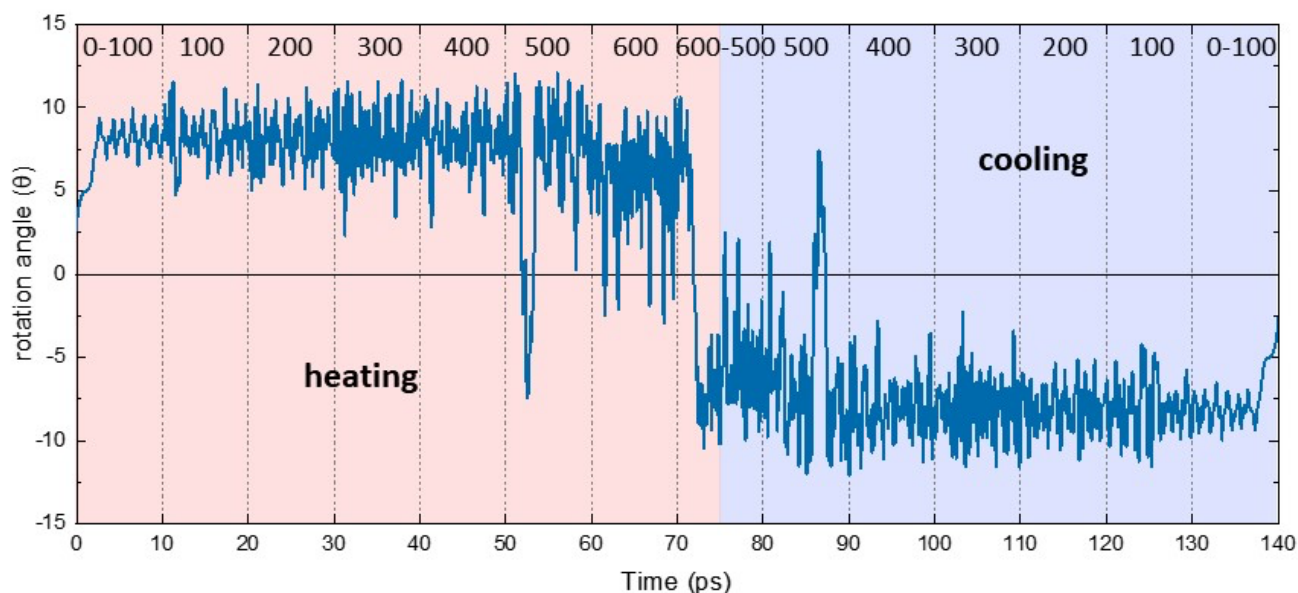

**Figure S2** Average rotation angle  $\theta_r$  as a function of temperature. Here the red and blue shaded areas indicate heating and cooling period. The system is heated till 600K and maintained until it switches its polarization. Then cooled immediately to maintain and prevent the back switching.

**Polarization-Magnetization combined switching:**

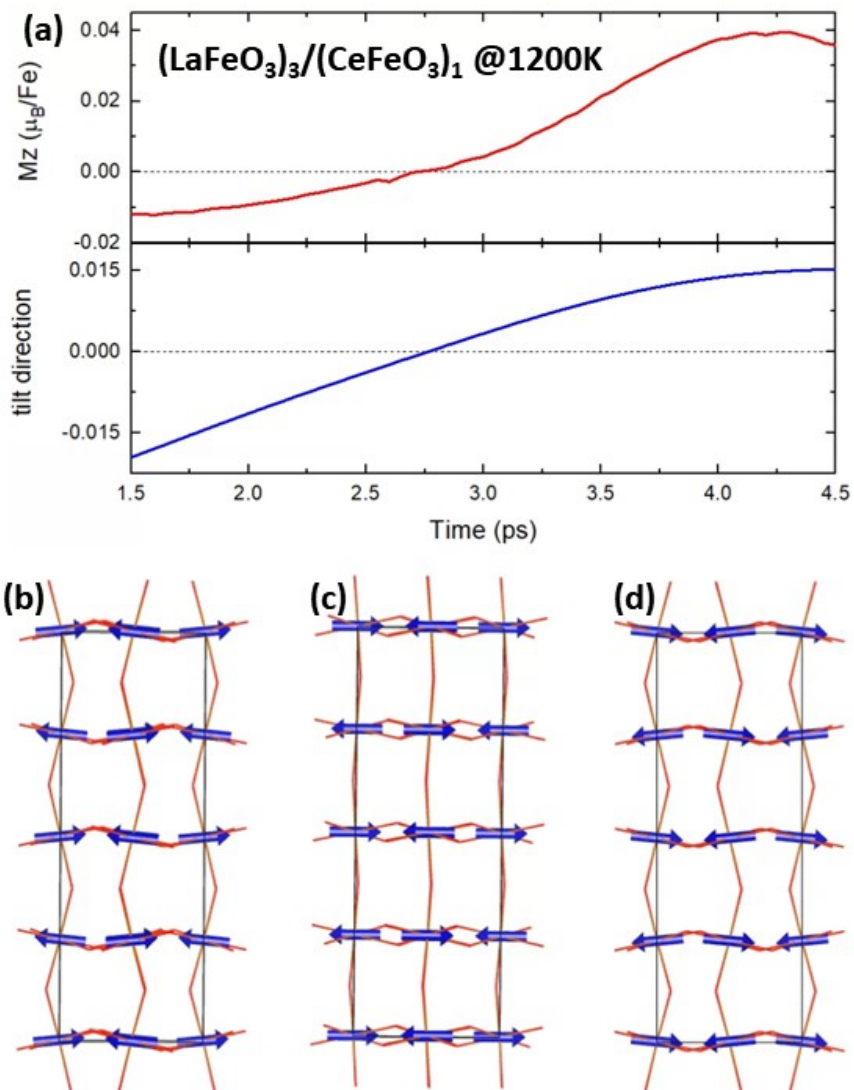

**Figure S3 Polarization-Magnetization combined switching.** AIMD simulation result of (LaFeO<sub>3</sub>)<sub>3</sub>/(CeFeO<sub>3</sub>)<sub>1</sub>. (a) Magnetization switching via tilt switching, the Mz and tilt direction as a function of simulation time. (b) to (d) Schematic showing the switching of Mz.
